# Supplementary material for: A self-powered wearable brain–machine-interface system for ceasing action
Source: Royal Society of Chemistry journal article supplement (doi:10.1039/d1nr08168c), 2022-01-01
Supplement: d1nr08168c1.pdf [file d1nr08168c1.pdf]

## **A self-powered wearable brain-machine-interface system for ceasing action**

Wang Xiang<sup>a,e</sup>, Yan Xie<sup>c,e</sup>, Yechao Han<sup>b</sup>, Zhihe Long<sup>d</sup>, Wanglinhan Zhang<sup>a</sup>, Tianyan Zhong<sup>a</sup>, Shan Liang<sup>a</sup>, Lili Xing<sup>a,\*</sup>, Xinyu Xue<sup>a,\*</sup>, Yang Zhan<sup>b,\*</sup>

*<sup>a</sup> School of Physics, University of Electronic Science and Technology of China, Chengdu 611731, China.*

*<sup>b</sup> CAS Key Laboratory of Brain Connectome and Manipulation, the Brain Cognition and Brain Disease Institute (BCBDI), Shenzhen Key Laboratory of Translational Research for Brain Diseases, Shenzhen Institutes of Advanced Technology, Chinese Academy of Sciences; Shenzhen-Hong Kong Institute of Brain Science-Shenzhen Fundamental Research Institutions, Shenzhen, 518055, China.*

*<sup>c</sup> Department of Neurology, Sichuan Provincial People's Hospital, University of Electronic Science and Technology of China, Chengdu 610072, China.*

*<sup>d</sup> Department of Mechanical Engineering, City University of Hong Kong, Hong Kong 999077, China*

*<sup>e</sup> These authors contributed equally to this work.*

**\*Corresponding authors:**

Xinyu Xue, e-mail address: xuexinyu@uestc.edu.cn

Yang Zhan, e-mail address: yang.zhan@siat.ac.cn

Lili Xing, e-mail address: xinglili@uestc.edu.cn

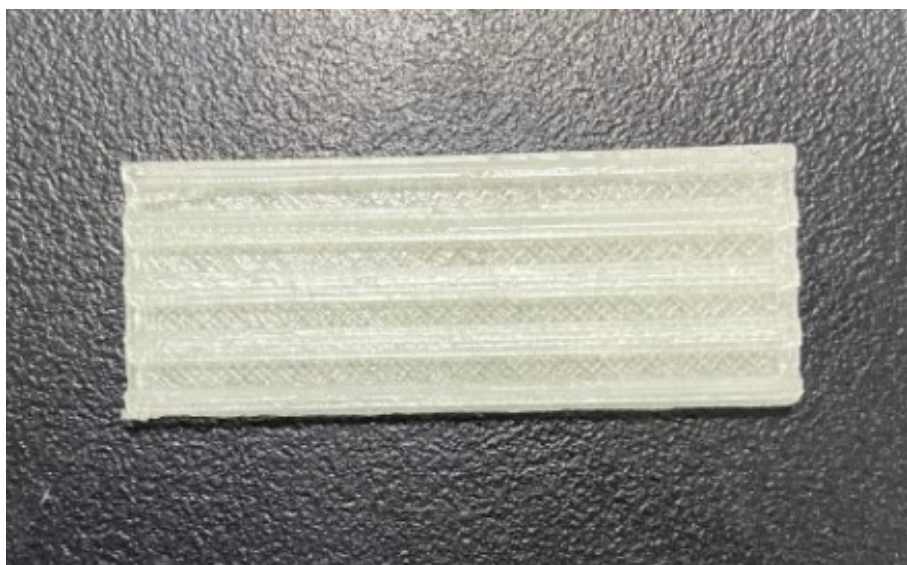

**Figure S1.** The 3D printed mold of photosensitive resin material.

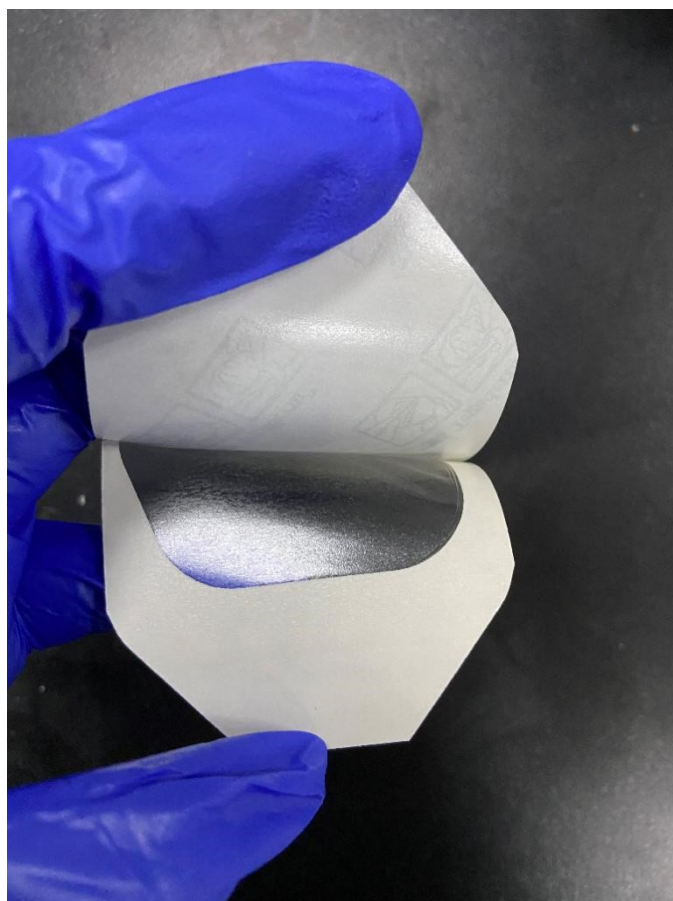

**Figure S2.** The 3M Tegaderm.

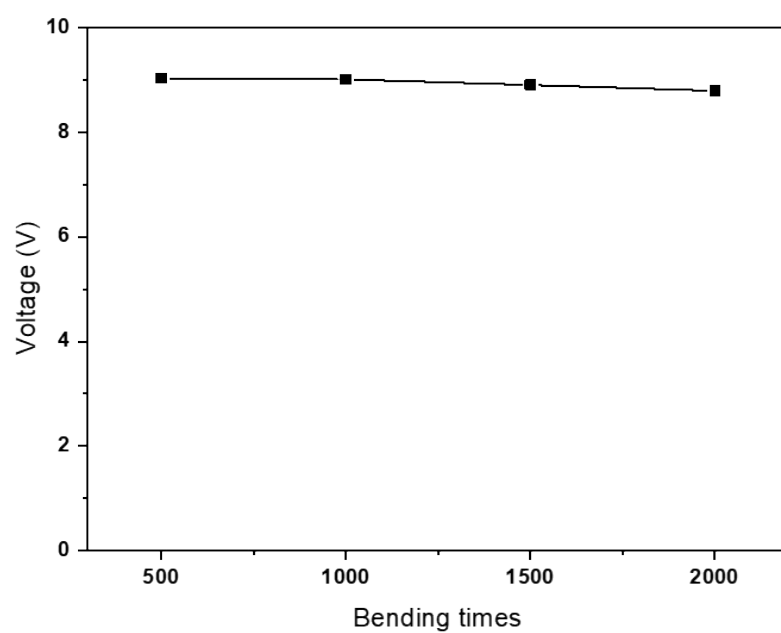

**Figure S3.** 2000 times consecutive impact experiment on PZT with a stepper motor.

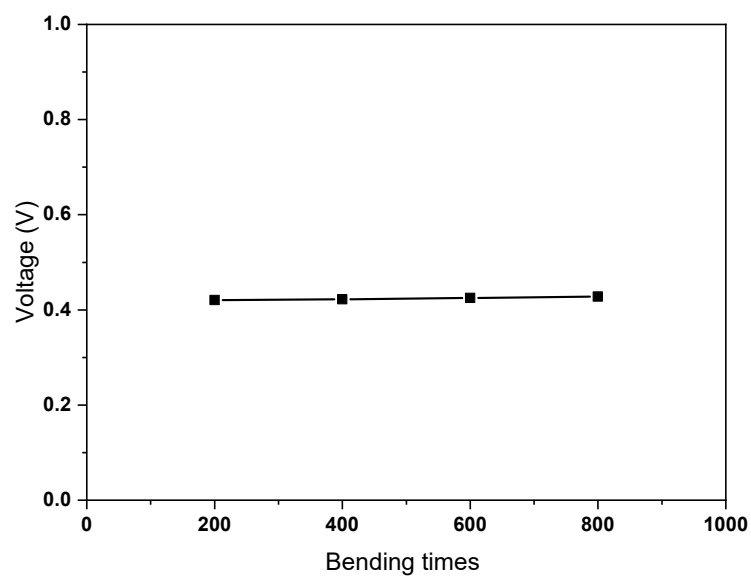

**Figure S4.** 800 times impact experiment on the biosensor with a stepper motor.

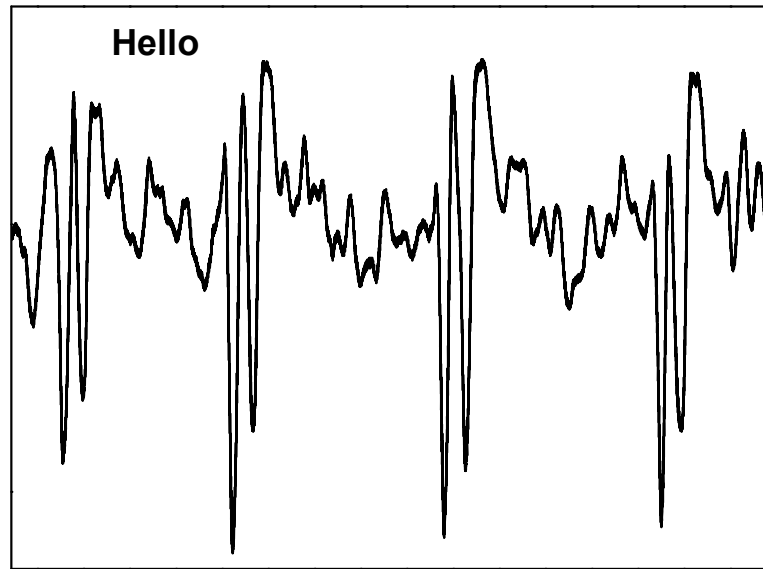

**Figure S5.** Repeating the test for 4 times on the word “hello”.

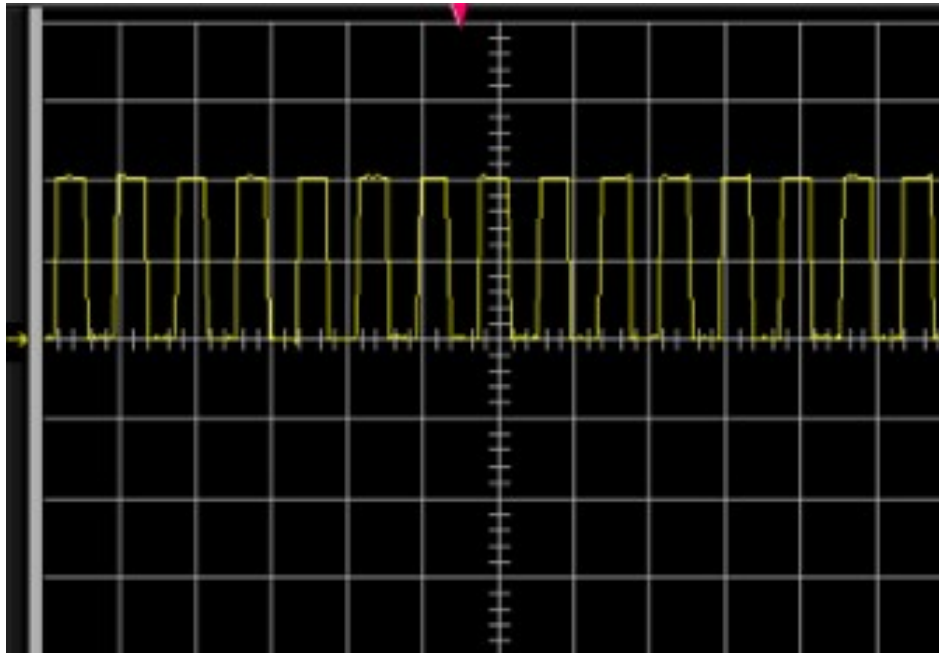

**Figure S6.** Stimulus signal output by oscilloscope.

### **Supplementary Video**

**Supplementary Movie S1** demonstrates the process of mice experiments. Whenever the mouse starts to run, input signals (typically 25 biphasic pulses with adjustable amplitude, each 2ms, 250 Hz) to stimulate it, and it can be observed that the mouse stops moving immediately.



## **Supplementary document**

**Supplementary Document S1** shows movement data of the mice.
