# Supplementary material for: A self-powered wearable brain–machine-interface system for ceasing action
Source: Royal Society of Chemistry journal article supplement (doi:10.1039/d1nr08168c), 2022-01-01
Supplement: d1nr08168c2.zip [file d1nr08168c2.zip]

## Sheet: Sheet1
		Start			End								Start			End
	4-	Minute	Second	Frame	Minute	Second	Frame	Running distance (loop)	Start time (s)	End time (s)	Running time (s)	4+	Minute	Second	Frame	Minute	Second	Frame	Running distance (loop)	Start time (s)	End time	Running time (s)
		5	19	14	6	5	22	24	319.462	365.726	46.264		5	26	15	5	27	15	0.2	326.495	327.495	1
		6	14	11	6	20	2	0.5	374.363	380.066	5.703		5	53	15	5	54	24	0.2	353.495	354.792	1.297
		6	22	0	7	40	16	49	382	460.528	78.528		6	7	20	6	8	28	0.25	367.66	368.924	1.264
		7	43	2	7	56	18	8.8	463.066	476.594	13.528		6	24	25	6	26	15	0.1	384.825	386.495	1.67
		7	59	5	9	46	22	69.8	479.165	586.726	107.561		7	14	3	7	15	21	0.25	434.099	435.693	1.594
		10	47	0	11	19	16	18	647	679.528	32.528		7	18	25	7	20	22	0.2	438.825	440.726	1.901
		11	38	19	11	42	20	1.2	698.627	702.66	4.033		7	25	22	7	28	9	0.6	445.726	448.297	2.571
		13	29	19	13	39	1	4.7	809.627	819.033	9.406		7	42	4	7	44	21	0.5	462.132	464.693	2.561
		13	45	5	13	59		4.2	825.165	839	13.835		8	14	8	8	15	18	0.2	494.264	495.594	1.33
		15	3	24	15	6	10	0.3	903.792	906.33	2.538		8	32	26	8	34	5	0.1	512.858	514.165	1.307
		16	16	23	16	19	5	1	976.759	979.165	2.406		8	45	22	8	47	5	0.4	525.726	527.165	1.439
		16	33	14	16	37	17	1.3	993.462	997.561	4.099		9	58	18	9	59	23	0.25	598.594	599.759	1.165
		16	44	3	17	0	16	3	1004.1	1020.53	16.429		10	4	22	10	5	5	0.3	604.726	605.165	0.439
		17	6	15	17	18	18	4.3	1026.49	1038.59	12.099		11	2	2	11	4	3	0.5	662.066	664.099	2.033
		17	46	5	18	17	20	13.6	1066.16	1097.66	31.495		11	5	20	11	9	13	1.5	665.66	669.429	3.769
		18	20	3	18	46	12	17	1100.1	1126.4	26.297		11	50	20	11	52	1	0.2	710.66	712.033	1.373
		19	1	23	19	5	23	2.2	1141.76	1145.76	4		13	30	10	13	33	3	0.6	810.33	813.099	2.769
		20	7	6	20	20	13	9	1207.2	1220.43	13.231		13	51	12	13	52	28	0.25	831.396	832.924	1.528
		20	25	1	21	21	5	42.8	1225.03	1281.16	56.132		13	55	23	13	56	19	0.5	835.759	836.627	0.868
		23	15	25	23	34	1	6.4	1395.83	1414.03	18.208		14	37	18	14	42	21	2.1	877.594	882.693	5.099
Average								14.055			24.916								0.46			1.84885
